# Supplementary material for: Fragment-derived inhibitors of human N-myristoyltransferase block capsid assembly and replication of the common cold virus
Source: Springer Nature journal article supplement (doi:10.1038/s41557-018-0039-2), 2018-05-14
Supplement: 41557_2018_39_MOESM3_ESM.mol [file 41557_2018_39_MOESM3_ESM.mol]

nchem.17081707B-compIMP1088.mol
  ChemDraw03011822562D

 33 36  0  0  0  0  0  0  0  0999 V2000
    3.1629    0.1081    0.0000 N   0  0  0  0  0  0  0  0  0  0  0  0
    2.6929    0.7861    0.0000 C   0  0  0  0  0  0  0  0  0  0  0  0
    1.9028    0.5486    0.0000 C   0  0  0  0  0  0  0  0  0  0  0  0
    1.8846   -0.2762    0.0000 C   0  0  0  0  0  0  0  0  0  0  0  0
    2.6634   -0.5485    0.0000 N   0  0  0  0  0  0  0  0  0  0  0  0
    1.1976    0.9768    0.0000 C   0  0  0  0  0  0  0  0  0  0  0  0
    0.4742    0.5802    0.0000 C   0  0  0  0  0  0  0  0  0  0  0  0
    0.4560   -0.2446    0.0000 C   0  0  0  0  0  0  0  0  0  0  0  0
    1.1612   -0.6728    0.0000 C   0  0  0  0  0  0  0  0  0  0  0  0
    2.9419   -1.3250    0.0000 C   0  0  0  0  0  0  0  0  0  0  0  0
    3.0450    1.5322    0.0000 C   0  0  0  0  0  0  0  0  0  0  0  0
    3.8216    1.8107    0.0000 N   0  0  0  0  0  0  0  0  0  0  0  0
   -0.2402    0.9927    0.0000 C   0  0  0  0  0  0  0  0  0  0  0  0
   -0.2402    1.8177    0.0000 C   0  0  0  0  0  0  0  0  0  0  0  0
   -0.9547    2.2302    0.0000 C   0  0  0  0  0  0  0  0  0  0  0  0
   -1.6692    1.8177    0.0000 C   0  0  0  0  0  0  0  0  0  0  0  0
   -1.6692    0.9927    0.0000 C   0  0  0  0  0  0  0  0  0  0  0  0
   -0.9547    0.5802    0.0000 C   0  0  0  0  0  0  0  0  0  0  0  0
   -2.3837    2.2302    0.0000 F   0  0  0  0  0  0  0  0  0  0  0  0
   -0.9547   -0.2448    0.0000 O   0  0  0  0  0  0  0  0  0  0  0  0
   -2.3994    0.5710    0.0000 F   0  0  0  0  0  0  0  0  0  0  0  0
   -1.6843   -0.6661    0.0000 C   0  0  0  0  0  0  0  0  0  0  0  0
   -2.4138   -0.2448    0.0000 C   0  0  0  0  0  0  0  0  0  0  0  0
   -3.1441   -0.6665    0.0000 C   0  0  0  0  0  0  0  0  0  0  0  0
    4.0398    2.6252    0.0000 C   0  0  0  0  0  0  0  0  0  0  0  0
    4.4178    1.2145    0.0000 C   0  0  0  0  0  0  0  0  0  0  0  0
   -3.9586   -0.4482    0.0000 C   0  0  0  0  0  0  0  0  0  0  0  0
   -4.4178   -1.1554    0.0000 N   0  0  0  0  0  0  0  0  0  0  0  0
   -3.8872   -1.8107    0.0000 N   0  0  0  0  0  0  0  0  0  0  0  0
   -3.1000   -1.5085    0.0000 C   0  0  0  0  0  0  0  0  0  0  0  0
   -4.1054   -2.6252    0.0000 C   0  0  0  0  0  0  0  0  0  0  0  0
   -2.5037   -2.1048    0.0000 C   0  0  0  0  0  0  0  0  0  0  0  0
   -4.3802    0.2820    0.0000 C   0  0  0  0  0  0  0  0  0  0  0  0
  1  2  2  0      
  2  3  1  0      
  3  4  2  0      
  4  5  1  0      
  5  1  1  0      
  3  6  1  0      
  6  7  2  0      
  7  8  1  0      
  8  9  2  0      
  9  4  1  0      
  5 10  1  0      
  2 11  1  0      
  7 13  1  0      
 13 14  2  0      
 14 15  1  0      
 15 16  2  0      
 16 17  1  0      
 17 18  2  0      
 16 19  1  0      
 18 13  1  0      
 18 20  1  0      
 17 21  1  0      
 20 22  1  0      
 22 23  1  0      
 23 24  1  0      
 12 25  1  0      
 12 26  1  0      
 11 12  1  0      
 24 27  1  0      
 27 28  2  0      
 28 29  1  0      
 29 30  1  0      
 30 24  2  0      
 29 31  1  0      
 30 32  1  0      
 27 33  1  0      
M  END
